# Supplementary material
Source: Springer Nature journal article supplement (https://www.springermedizin.de/resource/supplementary/12889_2013_7554_MOESM3_ESM.pdf/9497894)
Supplement: MOESM3 [file 9497894]

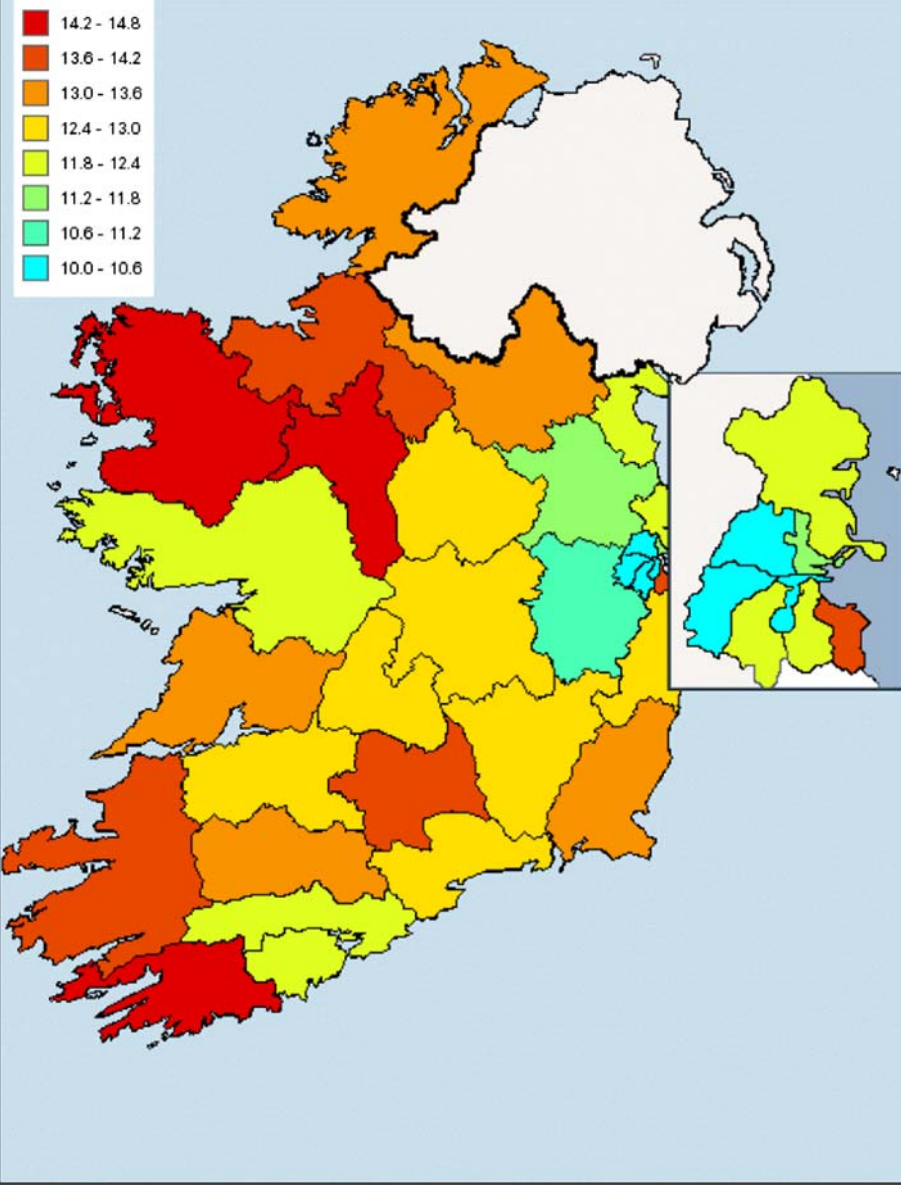

Legend: The enlarged section on the right side of the map shows the ten Local Health Offices in the Dublin region.
